# Supplementary material
Source: PubMed Central journal article supplement (PMC3695365)
Supplement: supp_blood-2013-03-488080_blood-2013-03-488080-1.pdf [file supp_blood-2013-03-488080_blood-2013-03-488080-1.pdf]

**Supplemental Information**

**Analysis of disease-causing GATA1 mutations in murine gene complementation systems**

**Amy E. Campbell, Lorna Wilkinson-White, Joel P. Mackay, Jacqueline M. Matthews, and Gerd A. Blobel**

## **Supplemental Methods**

### **Plasmids**

The murine GATA1 coding sequence alone or fused to the ligand binding domain of the estrogen receptor was cloned into the MSCV-based retroviral vector MIGR1 to generate MIGR1-GATA1 and MIGR1-GATA1-ER. Point mutations were introduced by site-directed mutagenesis (QuickChange, Stratagene). Murine FOG1 was cloned into MIGR1 with a single Flag tag (DYKDDDDK) fused to the C-terminus to generate MIGR1-FOG1-FLAG.

### **Western blot analysis**

Nuclear extracts were prepared according to standard methods. Samples were fractionated through polyacrylamide gels and transferred onto nitrocellulose (Bio-Rad) or Immobilon-FL PVDF (Millipore) membranes. Blots were probed with antibodies against GATA1 (sc-265; Santa Cruz), FOG1 (sc-9361; Santa Cruz), and  $\beta$ -actin (A3854; Sigma-Aldrich). Signals were detected with autoradiography using chemiluminescence (Thermo Scientific) by addition of horseradish peroxidase-conjugated anti-rat antibody (A5795; Sigma-Aldrich) or with an Odyssey Imager after addition of infrared fluorescent-labeled anti-rat (926-68029 or 926-32219; LiCor) or anti-goat (926-68024 or 926-32214; LiCor) antibody. Band intensities were quantified using ImageJ.

### **Hemoglobin quantification**

For hemoglobin assay,  $5-10 \times 10^6$  cells were lysed in 100  $\mu$ l of Drabkin's reagent (D5941; Sigma-Aldrich), and hemoglobin content was quantified by spectrophotometric

measurement of absorbance at 540 nm on a SpectraMax 190 microplate reader. Hemoglobin content was normalized to total protein, which was determined via Bradford assay.

### **Flow cytometry**

Cells were acquired using a FACSCanto and data analyzed with BD FACSDiva software (BD Biosciences). Cell sorting was performed with a FACSDiva or FACSARIA II (BD Biosciences). For G1ME lineage analysis, cells were stained in PBS with 2% FBS at room temperature for 15 minutes with the following antibodies: anti-Ter119-APC, anti-CD41-PE (BD Biosciences), and anti-CD42-PE (Emfret Analytics).

### **Transfections and co-immunoprecipitations**

Transient transfections of HEK-293 cells were performed using polyethylenimine (PEI) at a ratio of PEI to DNA of 3:1. Cells were harvested 48 h after transfection and nuclear extracts prepared according to standard methods. Immunoprecipitation was performed with anti-FLAG beads (Sigma-Aldrich), and after extensive washing, elution was carried out with 1X FLAG peptide (Sigma-Aldrich) and bound proteins analyzed by Western blotting.

### **Protein production and purification**

Construction, expression, and purification of LMO2<sub>LIM2</sub>-Ldb1<sub>LID</sub>, dFOG-F1 and GATA1 NF have been previously described.<sup>1-3</sup> GATA1 NF mutants were expressed and purified

using the same strategy as wild-type GATA1, with one-dimensional  $^1\text{H}$  NMR used to confirm protein folding.

### **Isothermal titration calorimetry**

Experiments were performed using a VP-ITC microcalorimeter (MicroCal) at 20 °C in 10 mM sodium phosphate, 10 mM NaCl, 1 mM DTT pH 7.5. For FOG/NF titrations, dFOG-F1 (200  $\mu\text{M}$ ) was titrated into a solution containing GATA1 (19  $\mu\text{M}$ ), G208S (20  $\mu\text{M}$ ), G208R (18  $\mu\text{M}$ ), R216W (18  $\mu\text{M}$ ), or D218Y (19  $\mu\text{M}$ ).<sup>4</sup> For NF/DNA titrations, GATA1 (189  $\mu\text{M}$ ), G208R (196  $\mu\text{M}$ ), R216W (187  $\mu\text{M}$ ) or D218Y (215  $\mu\text{M}$ ) were titrated into a solution containing a double-stranded 16-bp oligonucleotide containing a GATC site (19-30  $\mu\text{M}$ ).<sup>4</sup> Data were analyzed using Origin 5.0 (MicroCal).

### **NMR spectroscopy**

Chemical shift perturbation experiments were carried out using  $^{15}\text{N}$ -LMO2<sub>LIM2</sub>-Ldb1<sub>LID</sub> (200  $\mu\text{M}$ ) in 20 mM Mes, 100 mM NaCl, 1 mM DTT pH 6.5. Increasing amounts of unlabelled GATA1 NF (wild-type or mutant) were added up to 1 molar equivalent, with  $^1\text{H}$ ,  $^{15}\text{N}$  HSQC spectra recorded after each addition. The weighted average chemical shift changes for the peaks E118, G132 and V131 were calculated using the equation  $\Delta_{\text{avg}} = (((\delta\text{H})^2 + (\delta\text{N} \times 0.154)^2)/2)^{1/2}$ .<sup>5</sup>

### **Primers**

#### Mutagenesis primers (5' to 3')

GATA1\_V205M

Forward: GGCCAGAGAGTGTATGAACTGTGGAGCAACG

Reverse: CGTTGCTCCACAGTTCATACACTCTCTGGCC

GATA1\_G208S

Forward: GAGAGTGTGTGAACTGTTCAGCAACGGCTACTCC

Reverse: GGAGTAGCCGTTGCTGAACAGTTCACACACTCTC

GATA1\_G208R

Forward: GAGAGTGTGTGAACTGTAGAGCAACGGCTACTCC

Reverse: GGAGTAGCCGTTGCTCTACAGTTCACACACTCTC

GATA1\_R216Q

Forward: GGCTACTCCACTGTGGCAGAGGGACAGGACAGG

Reverse: CCTGTCCTGTCCCTCTGCCACAGTGGAGTAGCC

GATA1\_R216W

Forward: GGCTACTCCACTGTGGTGGAGGGACAGGACAGG

Reverse: CCTGTCCTGTCCCTCACCACAGTGGAGTAGCC

GATA1\_D218G

Forward: CCACTGTGGCGGAGGGGCAGGACAGGTCCTACC

Reverse: GGTAGTGACCTGTCCTGCCCTCCGCCACAGTGG

GATA1\_D218Y

Forward: CCACTGTGGCGGAGGTACAGGACAGGTCCTACC

Reverse: GGTAGTGACCTGTCCTGTACCTCCGCCACAGTGG

GATA1\_R202Q

Forward: GCCCCTTGTGAGGCCCAAGAGTGTGTGAACTGTGG

Reverse: CCACAGTTCACACACTCTTGGGCCTCACAAGGGGC

GATA1\_R217M

Forward: ACTCCACTGTGGCGGATGGACAGGACAGGTCCTACC

Reverse: GGTAGTGACCTGTCCTGTCCATCCGCCACAGTGGAGT

Transcript qPCR primers (5' to 3')

*Alad*

Forward: ACTTTCACCCACTGCTTCGGA

Reverse: CGATAGGCTGGACATCATCAGG

*Alas2*

Forward: TATGTGCAGGCCATCAACTACCCA

Reverse: TTTCCATCATCTGAGGGCTGTGGT

*Alox5*

Forward: ACTACATCTACCTCAGCCTCATT

Reverse: GGTGACATCGTAGGAGTCCAC

*Alox12*

Forward: CACACATGGTGAGGAAATGG

Reverse: GATCACTGAAGTGGGGCTGT

*Casp3*

Forward: TGGCAACGGAATTCGAGTCCTTCT

Reverse: TGAGCATGGACACAATACACGGGA

*Clec4d*

Forward: CGAGAGTAACGTGCATCCGA

Reverse: AACAGGACAGCAGGTCCAAGTAC

*Cmtm7*

Forward: GTGCGACCTGATAATGATCCTC

Reverse: GGTGAGCACACGGTAGAAGC

*Cpox*

Forward: ATGCAATTTGAAGCCAGTCCGTGG

Reverse: TCCCTTTGTAGAATAGCCTGGCCT

*Eraf*

Forward: GCCATGACAGAATTCCAGCAA

Reverse: TTTGGACTTCAGAAAGGTCCTGTAT

*Fech*

Forward: AGAGAAGCGAGGTGGTCATTCTGT

Reverse: ATGACTTTGTGGACAGTGGCTCCT

*Fyb*

Forward: CGAAGTTCAACACGGGGAGTA

Reverse: TGTATTCCAGAAGGCGAGCTT

*Gata2*

Forward: CACCCCTAAGCAGAGAAGCAA

Reverse: TGGCACCACAGTTGACACACT

*Gcnt2*

Forward: CTACGCGGGAAAGTTTTTCGC

Reverse: GTAGAGGTTGGGCAGGCTTA

*Gp6*

Forward: GTCTCTCCCAAGTGACCAGCTT

Reverse: GAGCTGAGAGTGAGGGTTTAGCA

*Gypa*

Forward: TCACACGGCCCCTACTGAAGTGT

Reverse: TCCCTGCCATCACGCGGAAAAT

*Hba-a1*

Forward: GTGGATCCCGTCAACTTCAAG

Reverse: CAAGGTCACCAGCAGGCAGT

*Hbb-b1*

Forward: AACGATGGCCTGAATCACTTG

Reverse: AGCCTGAAGTTCTCAGGATCC

*Hmbs*

Forward: ATTCCAAGAGGAGCCCAGCTAG

Reverse: CATCATTAAGCTGCCGTGCA

*Kit*

Forward: AGCAGATCTCGGACAGCACC

Reverse: TGCAGTTTGCCAAGTTGGAG

*Lrrc39*

Forward: AAACACCATGAAGACGTGAAGCGG

Reverse: TTCCATCTTCCCTGGTCACCTTCT

*Ly75*

Forward: CACGGACAACCTGCGAATGT

Reverse: GTATTGGCTACGGCATATCCATC

*Myb*

Forward: TGACTTTTCGACACATGGCTCCTCA

Reverse: AATGCACTTGGTGCTGCTCTCAAC

*Ms4a2*

Forward: TGGTTGGTTTGATATGCCTTTGT

Reverse: CACTGCACCCCAGAATGGATA

*Ppox*

Forward: TGCTGTAGAATTCTGGCCTCCGAA

Reverse: TCCATCCTGTCCGTGTGCAGATAA

*Reep6*

Forward: GAAACACCCTCACAGCAGCACAAA

Reverse: TGCACACCTTGGAGGAGAGATGTT

*Rragd*

Forward: TTTGGGACTCTTTGCTGCCAGTTG

Reverse: TCTTATTGCTCTGGCCTGGAGCTT

*Slc4a1*

Forward: TGGAGGCCTGATCCGTGATA

Reverse: AGCGCATCGGTGATGTCA

*Urod*

Forward: CCTACATTCGTGATGTGGCCA

Reverse: GGCAAATGTCCATCCTTAGCA

*Uros*

Forward: ATGGAACGCAGATTCGGAGA

Reverse: TGACCTAATGGCCAGTGAACCT

*Vwf*

Forward: TCATCGCTCCAGCCACATTCCATA

Reverse: AGCCACGCTCACAGTGGTTATACA

*Zfpml*

Forward: CCTTGCTACCGCAGTCATCA

Reverse: ACCAGATCCCGCAGTCTTTG

ChIP qPCR primers (5' to 3')

*Abcb10* -6 kb

Forward: AGTCTCTATGCCAGCTTCTTTGG

Reverse: AAGACAACGAGAGGAACAGGCAGT

*Alad* +4 kb

Forward: ACTGTGCAGCCTTCCCTCAAGTAA

Reverse: TAGCCACAAGATAAGCCAGTGCCA

*Alas2* +2 kb

Forward: AGGGCAGGACTTTGCCTCTAATCT

Reverse: AGATGTCCCAGTTCCTGCAGGTTT

*Gata2* -3.9 kb

Forward: GAGATGAGCTAATCCCGCTGTA

Reverse: AAGGCTGTATTTTCCAGGCC

*Hbb* HS2

Forward: GGGTGTGTGGCCAGATGTTT

Reverse: CACCTTCCCTGTGGACTTCCT

*Hbb* HS3

Forward: CTAGGGACTGAGAGAGGCTGCTT

Reverse: ATGGGACCTCTGATAGACACATCT

*Hba-a1* -12 kb



Forward: AACCTGACTCAAAACAACAAAGTAA  
Reverse: GGTTCCTGAGTTTCCTTATCTGCAA

*Hbb-b1* prom

Forward: CAGGGAGAAATATGCTTGTCATCA  
Reverse: GTGAGCAGATTGGCCCTTACC

*I19r* prom

Forward: ACATTGCCGAGGACACAGTTCTCT  
Reverse: TGCATTGCGGAAGGTGAGTCTGTA

*Kit* +33 kb

Forward: TGGCAGTCCTGGTTGTAGCA  
Reverse: GCTGCAAGCATGCGATCA

*Lrrc39* prom

Forward: TTCCCTGGTGTCTGTAGGAACACA  
Reverse: GGGCTTCTGTGCAAAGGTTCAACT

*Lyl1* prom

Forward: TCAGCATTGCTTCTTATCAGCC  
Reverse: CGCAGAGGCCAGAGGATG

*Pkhd11l* +0.4 kb

Forward: CCGTTCTTCTTGCTCTCCTTGTGT  
Reverse: AGCTTACCCTGGAAGTGACAGACA

*Rragd* +4 kb

Forward: CTTGGAATCCGAGGAAATGA  
Reverse: TGGATATCCTCTGGGGAGTG

*Slc4a1* +1.6 kb

Forward: ATCAGAAGCAACCTAGAGTCCAGC  
Reverse: TAAGAGTGTAGGACCAGCAGGCAA

*Slc4a1* prom

Forward: CTGAGCAGTCAAGCCTTAGTTCAC  
Reverse: CCTGTCCAGTCCCTAAGGTCTTT

*Slc22a4* +1.2 kb

Forward: CAGCAATGGTGGGAAGGCAGATTT  
Reverse: ACAAGCACTGTTTCTGGCAAGAGC

*Spnal* prom

Forward: ATGCCTCACTTTGTCCTGAGCTGT  
Reverse: TGTCCCTCTGGGCCTTGTTTATCA

*Tph1* prom

Forward: ACACGCTTTCACAGAAACCACCAC

Reverse: TCTCCATTAACCGCGTTTCCTCT

*Tubb1* +3 kb

Forward: CTGTGTTGACTTGAAGGCCTTTGG

Reverse: TGA CTCCTGTGGCACATAAGGGTA

*Uros* +6 kb

Forward: TACTGCCTGGAAAGGCAAGTGAGA

Reverse: ATCTGCCACTGGTATGTCCCAGAA

*Uros* +11 kb

Forward: ACTGCCTTGGTGCTCGTGTGATAA

Reverse: AGCTTGCAGAACTTAGCAGCTTCC

*Zfp1* +2 kb

Forward: CTTTTCTCCTGCCCAGTCG

Reverse: TGCTGTTGCCTCGAACC

## Supplemental References

1. Liew CK, Kowalski K, Fox AH, et al. Solution structures of two CCHC zinc fingers from the FOG family protein U-shaped that mediate protein-protein interactions. *Structure*. 2000;8(11):1157–1166.
2. Ryan DP, Sunde M, Kwan AHY, et al. Identification of the key LMO2-binding determinants on Ldb1. *J Mol Biol*. 2006;359(1):66–75.
3. Wilkinson-White L, Gamsjaeger R, Dastmalchi S, et al. Structural basis of simultaneous recruitment of the transcriptional regulators LMO2 and FOG1/ZFPM1 by the transcription factor GATA1. *Proc Natl Acad Sci USA*. 2011;108(35):14443–14448.
4. Liew CK, Simpson RJY, Kwan AHY, et al. Zinc fingers as protein recognition motifs: structural basis for the GATA-1/friend of GATA interaction. *Proc Natl Acad Sci USA*. 2005;102(3):583–588.
5. Ayed A, Mulder FA, Yi GS, et al. Latent and active p53 are identical in conformation. *Nat. Struct. Biol*. 2001;8(9):756–760.

**Table S1. Hematologic profiles of patients carrying GATA1 mutations**

| Mutation       | Hgb (g/dL)<br>(10.5 - 16) | Hct (%)<br>(33 - 46) | RBC (x10 <sup>6</sup> /μL)<br>(3.9 - 5.2) | MCV (μm <sup>3</sup> )<br>(70 - 100) | MCH (pg)<br>(23 - 34) | Retic (%)<br>(0.5 - 1.5) | nRBC (%)<br>(0) | RDW<br>(11.5 - 14.5) | Plt (x10 <sup>3</sup> /μL)<br>(150 - 400) | MPV (x10 <sup>-15</sup> L)<br>(8 - 12) | Tpo (pg/mL)<br>(60 - 150) |
|----------------|---------------------------|----------------------|-------------------------------------------|--------------------------------------|-----------------------|--------------------------|-----------------|----------------------|-------------------------------------------|----------------------------------------|---------------------------|
| V205M<br>n = 2 | 8.4                       | 28.3                 | 3.1                                       | 92.4                                 | 27.5                  | 3                        | 27              | 20.6                 | 17.5                                      | -                                      | -                         |
| G208S<br>n = 3 | -                         | 43                   | -                                         | 100.4                                | 31.9                  | -                        | -               | -                    | 24                                        | 10.5                                   | 262.7                     |
| G208R<br>n = 3 | 9.5                       | 30                   | 2.97                                      | 104                                  | -                     | 4                        | -               | 17.8                 | 13.3                                      | -                                      | 1,755                     |
| R216Q<br>n = 7 | 11                        | 42.6                 | 5.4                                       | 78                                   | -                     | -                        | -               | 18.3                 | 73.5                                      | 9.5                                    | -                         |
| R216W<br>n = 1 | 7.0                       | -                    | -                                         | 67                                   | <20                   | 5                        | -               | -                    | 70                                        | -                                      | -                         |
| D218G<br>n = 4 | 13.4                      | 42                   | 4.5                                       | -                                    | -                     | -                        | -               | 15.3                 | 34                                        | -                                      | -                         |
| D218Y<br>n = 1 | 9.7                       | 33.5                 | 3.4                                       | -                                    | -                     | -                        | -               | 17.2                 | 12                                        | -                                      | -                         |

Normal values for each parameter are indicated in parentheses. The number of individuals with reported hematologic indices is noted below each mutation. Indices shown are the average of all individuals. Hgb, hemoglobin concentration; Hct, hematocrit; RCB, red blood cell number; MCV, mean corpuscular volume; MCH, mean corpuscular hemoglobin; Retic, reticulocytes as percentage of total red blood cells; nRBC, number of nucleated red blood cells per 100 white blood cells; RDW, red blood cell distribution width; Plt, platelet number; MPV, mean platelet volume; Tpo, thrombopoietin concentration. Data were gathered from <sup>27,32, 34-38</sup>.

**Table S2. Examined erythroid GATA1 target genes display similar expression profiles in response to GATA1 mutations**

**Sensitive to GATA1 mutations**

|               |                 |
|---------------|-----------------|
| <i>Hbb-b1</i> | <i>Gypa</i>     |
| <i>Hba-a1</i> | <i>Hri</i>      |
| <i>Abcb10</i> | <i>Epb4.9</i>   |
| <i>Eraf</i>   | <i>Ank1</i>     |
| <i>Alas2</i>  | <i>Spna1</i>    |
| <i>Alad</i>   | <i>Spnb1</i>    |
| <i>Hmbs</i>   | <i>Gstt1</i>    |
| <i>Uros</i>   | <i>Cetn4</i>    |
| <i>Urod</i>   | <i>Slc4a1*</i>  |
| <i>Cpox</i>   | <i>Lrrc39*</i>  |
| <i>Ppox</i>   | <i>Rragd*</i>   |
| <i>Fech</i>   | <i>Slc22a4*</i> |
| <i>Myb</i>    | <i>Myc</i>      |
| <i>Kit</i>    | <i>Hhex</i>     |
| <i>Gata2†</i> | <i>Casp3</i>    |

**Insensitive to GATA1 mutations**

|               |                |
|---------------|----------------|
| <i>Zfpm1</i>  | <i>Klf1</i>    |
| <i>Lyl1</i>   | <i>Adamts5</i> |
| <i>Clec4d</i> | <i>Rgs18</i>   |
| <i>Tmem44</i> | <i>Car1</i>    |

\*More sensitive to R216Q and D218G

†Less sensitive to G208S

**Table S3. Examined megakaryocyte GATA1 target genes display similar expression profiles in response to GATA1 mutations**

---

**Sensitive to GATA1 mutations**

|               |                |
|---------------|----------------|
| <i>Vwf</i>    | <i>Pf4</i>     |
| <i>Alox12</i> | <i>Thbs1</i>   |
| <i>Capn2</i>  | <i>Itgb3</i>   |
| <i>Ppbp</i>   | <i>Gp6</i>     |
| <i>Tubb1</i>  | <i>Itga2b</i>  |
| <i>Gata2</i>  | <i>Slc22a3</i> |
| <i>Il1rl1</i> | <i>Fcgr3</i>   |
| <i>Ly75</i>   | <i>Cmtm7</i>   |

**Insensitive to GATA1 mutations**

|              |               |
|--------------|---------------|
| <i>Asb1</i>  | <i>Pkn3</i>   |
| <i>Reep6</i> | <i>Blvrb</i>  |
| <i>Gcnt2</i> | <i>Clec4e</i> |
| <i>Kit</i>   | <i>Hmga2</i>  |

---

**Table S4. FOG and DNA binding affinities of GATA1 mutants**

| Protein | $k_a$                                |                               |
|---------|--------------------------------------|-------------------------------|
|         | GATA1:FOG, M <sup>-1</sup>           | GATA1:DNA, M <sup>-1</sup>    |
| GATA1   | $(4.5 \pm 1.8) \times 10^4^*$        | $(1.9 \pm 0.1) \times 10^6^*$ |
|         | $(6.6 \pm 0.1) \times 10^4$          | $(1.6 \pm 0.3) \times 10^7$   |
| V205M   | No binding*                          | $(2.0 \pm 1.6) \times 10^7^*$ |
| G208S   | $(1.3 \pm 0.7) \times 10^{5\dagger}$ | $(9.1 \pm 5.2) \times 10^6^*$ |
| G208R   | No binding                           | $(1.8 \pm 0.3) \times 10^7$   |
| R216Q   | $(9.4 \pm 0.3) \times 10^4^*$        | No binding*                   |
| R216W   | $(1.7 \pm 0.1) \times 10^5$          | No binding                    |
| D218G   | $(1.9 \pm 0.3) \times 10^4^*$        | $>10^7^*$                     |
| D218Y   | No binding                           | $(2.4 \pm 1.0) \times 10^7$   |

Association constants are the average of two independent experiments. The error reports the range associated with that mean.

\*Reproduced from <sup>26</sup>.

<sup>†</sup>Previously published data indicated no detectable interaction.<sup>26</sup> New experiments reveal an interaction with wild-type like affinity but low enthalpy.

**Table S5. Examined GATA1 occupied elements**

**FOG1-dependent, single GATA motif**

*Hbb-b1* prom                      *Hba-a1* -12 kb

*Slc4a1* prom                      *Rragd* +4 kb

**FOG1-dependent, palindromic GATA motif**

*Slc4a1* +1.6 kb                      *Slc22a4* +1.2 kb

*Alad* +4 kb

**FOG1-independent, single GATA motif**

*Hbb* HS3                      *Hbb* HS2

*Eraf* prom                      *Klf1* prom

*Gata2* -3.9 kb                      *Lrrc39* prom

**FOG1-independent, palindromic GATA motif**

*Lyl1* prom                      *Zfpm1* +2 kb

*Spna1* prom                      *Alas2* +2 kb

*Abcb10* -6 kb                      *Kit* +33 kb

*Uros* +11 kb                      *Uros* +6 kb



**Table S6. Summary of disease-associated GATA1 mutations**

| GATA1 mutation | Associated human disease                                                             | Erythroid (G1E) maturation |         | MK (G1ME) maturation |         | DNA binding |         | FOG1 binding |         | TAL1 complex binding |         | Proposed mechanism of disease |
|----------------|--------------------------------------------------------------------------------------|----------------------------|---------|----------------------|---------|-------------|---------|--------------|---------|----------------------|---------|-------------------------------|
|                |                                                                                      | In vitro                   | In vivo | In vitro             | In vivo | In vitro    | In vivo | In vitro     | In vivo | In vitro             | In vivo |                               |
| Wild-type      |                                                                                      | +++                        | +++     | +++                  | +++     | +++         | +++     | +++          | +++     | +++                  | +++     |                               |
| V205M          | Severe macrothrombocytopenia<br>Severe dyserythropoietic anemia                      | -                          | +       | -                    | -       | +++         | +       | -            | -       | +++                  | +++     | Reduced FOG1 binding          |
| G208S          | Macrothrombocytopenia<br>Mild dyserythropoiesis without anemia                       | +                          | +       | -                    | -       | +++         | +++*    | +            | +       | ND                   | +++     | Reduced FOG1 binding          |
| G208R          | Severe macrothrombocytopenia<br>Severe dyserythropoietic anemia                      | -                          | -       | -                    | -       | +++         | +       | -            | -       | ND                   | +++     | Reduced FOG1 binding          |
| R216Q          | Macrothrombocytopenia<br>Mild dyserythropoiesis without anemia<br>Mild B-thalassemia | ++                         | ++      | +                    | +       | -           | +++     | +++          | +++     | -                    | +       | Reduced TAL1 complex binding  |
| R216W          | Thrombocytopenia<br>Congenital erythropoietic porphyria                              | ++                         | ++      | ++                   | ++      | -           | +++     | +++          | +++     | +++                  | +++     | ?                             |
| D218G          | Macrothrombocytopenia<br>Mild dyserythropoiesis without anemia                       | ++                         | ++      | +                    | +       | +++         | +++     | +++          | +++     | +                    | +       | Reduced TAL1 complex binding  |
| D218Y          | Severe macrothrombocytopenia<br>Severe dyserythropoietic anemia                      | -                          | -       | -                    | -       | +++         | +       | -            | -       | +++                  | +++     | Reduced FOG1 binding          |

\*The reduced DNA binding observed intracellularly is context-dependent and a secondary consequence of impaired FOG1 binding, not a direct effect on the DNA interaction surface. MK, megakaryocyte; ND, not determined.

## Supplemental Figure Legends

**Figure S1. G1E cells expressing GATA1 mutants.** (A and B) Anti-GATA1 and, as loading control, anti- $\beta$ -actin western blots of extracts from G1E cells expressing indicated versions of GATA1 after 24 h of E2 treatment. MEL cell extracts served as a control. Bands were quantified by densitometry and relative GATA1 levels are noted below each panel. ND = not determined. Black vertical line demarcates an unrelated excised lane. (C) Representative images of cell pellets (top) and hemoglobin concentrations (bottom) after 72 h of E2 treatment. (D) One-dimensional  $^1\text{H-NMR}$  spectra of GATA1 NF proteins. (E and F) Expression of GATA1-regulated genes after 24 h and 48 h of E2 treatment as determined by RT-qPCR, normalized to  $\beta$ -actin and plotted as fold change from uninfected samples. All error bars denote SEM ( $n = 3$ ).

**Figure S2. Effect of GATA1 mutations on genes encoding heme biosynthetic enzymes.** (A) Expression of all eight heme biosynthetic enzymes in G1E cells expressing indicated GATA1 versions after 24 h and 48 h of E2 treatment as determined by RT-qPCR, normalized to  $\beta$ -actin and plotted as fold change from uninfected samples. (B) Results from (A) at 24 h were plotted as fold change from GATA1-expressing cells. (C) Expression of additional genes implicated in heme biosynthesis after 24 h of E2 treatment as determined by microarray. Data are shown as fold change from wild-type. All error bars denote SEM ( $n = 3$ ).

**Figure S3. G1ME cells expressing GATA1 mutants.** (A) Western blot showing GATA1 expression in G1ME lines 72 h after infection with wild-type or mutant proteins

and compared to endogenous levels in MEL cells.  $\beta$ -actin serves as a loading control. Bands were quantified by densitometry and relative GATA1 levels are noted below each panel. (B and C) Surface expression of the terminal megakaryocyte marker CD42 and the erythroid marker Ter119 as assessed by flow cytometry in G1ME cells 72 h after infection with wild-type or mutant GATA1. Dot plots show a representative experiment. Percentages refer to the fraction of GFP positive cells expressing CD42 or Ter119. Approximately 45% of transduced cells were GFP positive. Error bars denote SEM (n = 3).

**Figure S4. FOG1 binding properties of GATA1 mutants.** (A) ITC data showing titration of the first ZF of the *Drosophila* FOG-family protein (dFOG-F1) into wild-type or mutant GATA1 NF. (B) Anti-GATA1 and anti-FOG1 ChIP in G1E cells expressing wild-type or mutant GATA1 after 24 h of E2 treatment using primers as in Figure 3. FOG1 ChIP signals were normalized to GATA1 ChIP signals at each site. (C) Expression of mast cell-specific genes after 24 h of E2 treatment as determined by RT-qPCR, normalized to  $\beta$ -actin and plotted as fold change from uninfected samples. All error bars denote SEM (n = 3).

**Figure S5. TAL1 complex binding properties of GATA1 mutants.** (A, B, and C) ChIP with indicated antibodies in G1E cells expressing wild-type or mutant GATA1 after 24 h of E2 treatment using primers as in Figure 3. TAL1 ChIP signals were normalized to GATA1 ChIP signals at each site. Error bars denote SEM. N = 3 for GATA1 and LMO2 ChIP, N = 2 for TAL1 ChIP.

**Figure S6. Engineered LMO2-disrupting mutations and factor occupancy at misregulated genes.** (A) Western blot showing GATA1 expression in G1E cells expressing wild-type or mutant GATA1 after 24 h of E2 treatment.  $\beta$ -actin serves as a loading control. Bands were quantified by densitometry and relative GATA1 levels are noted below each panel. ND = not determined. (B) May-Grünwald-Giemsa (MGG) and benzidine staining after 72 h of E2 treatment. The percentage of hemoglobin-positive cells is indicated in the upper right corner of each benzidine panel. Scale bars, 20  $\mu$ m (left panels) and 50  $\mu$ m (right panels). Compare to R216Q and D218G mutants in Figure 1B. (C) Hemoglobin concentrations and representative images of cell pellets after 72 h of E2 treatment. Compare to R216Q and D218G mutants in Figure S1C. (D) Expression of GATA1-regulated genes after 24 h of E2 treatment as determined by RT-qPCR, normalized to  $\beta$ -actin and plotted as fold change from GATA1-expressing cells. (E and F) Anti-GATA1, FOG1, and LMO2 ChIP after 24 h of E2 treatment. FOG1 and LMO2 ChIP signals were normalized to GATA1 ChIP signals at this binding site. (G) Anti-GATA1 ChIP after 24 h of E2 treatment using primers recognizing binding sites at genes whose activities are at least 2-fold increased or decreased when compared to wild-type GATA1 expressing cells. All error bars denote SEM (n = 3).

**Figure S7. Possible physical causes of differential effects of R216 and D218 mutations.** GATA1 NF (grey; surface representation), FOG1 (cyan; surface representation), LMO2-Ldb1 (orange; surface representation). (A-C) R216 mutations. Wild-type R216 shown in red, Q216 shown in purple and W216 shown in magenta. Whereas the R216W mutation is similar in size to the wild-type side chain, and may be

stabilized by various new interactions as indicated (dashed lines), the R216Q mutation is smaller leading to possible collapse of the LMO2 binding face (black arrow) due to repacking of side chains. (D-F) D218 mutations. Wild-type D218 (red), G218 (purple) and Y218 in magenta. D218G truncates the side chain and introduces flexibility into the backbone, leading to possible collapse of the LMO2 binding face (black arrow) due to repacking of the side chains. The larger D218Y mutation could maintain the position of the LMO2 binding face, but require repacking of the small hydrophobic core of the NF (black arrow) leading to disruption of the FOG1 binding face. Models are based on the coordinates of PDB accession code 2L6Z.

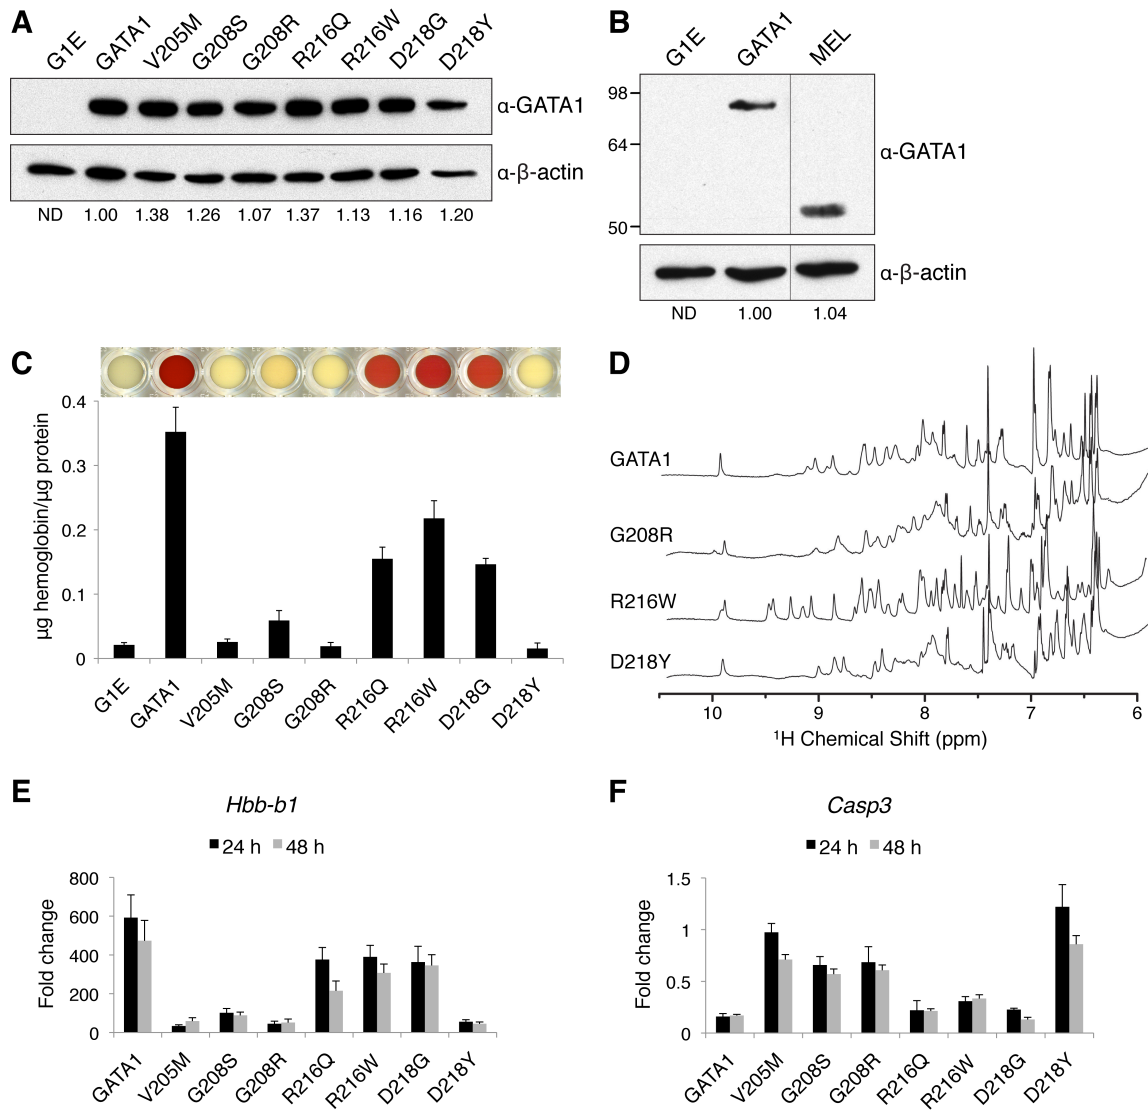

Supplemental Figure 1

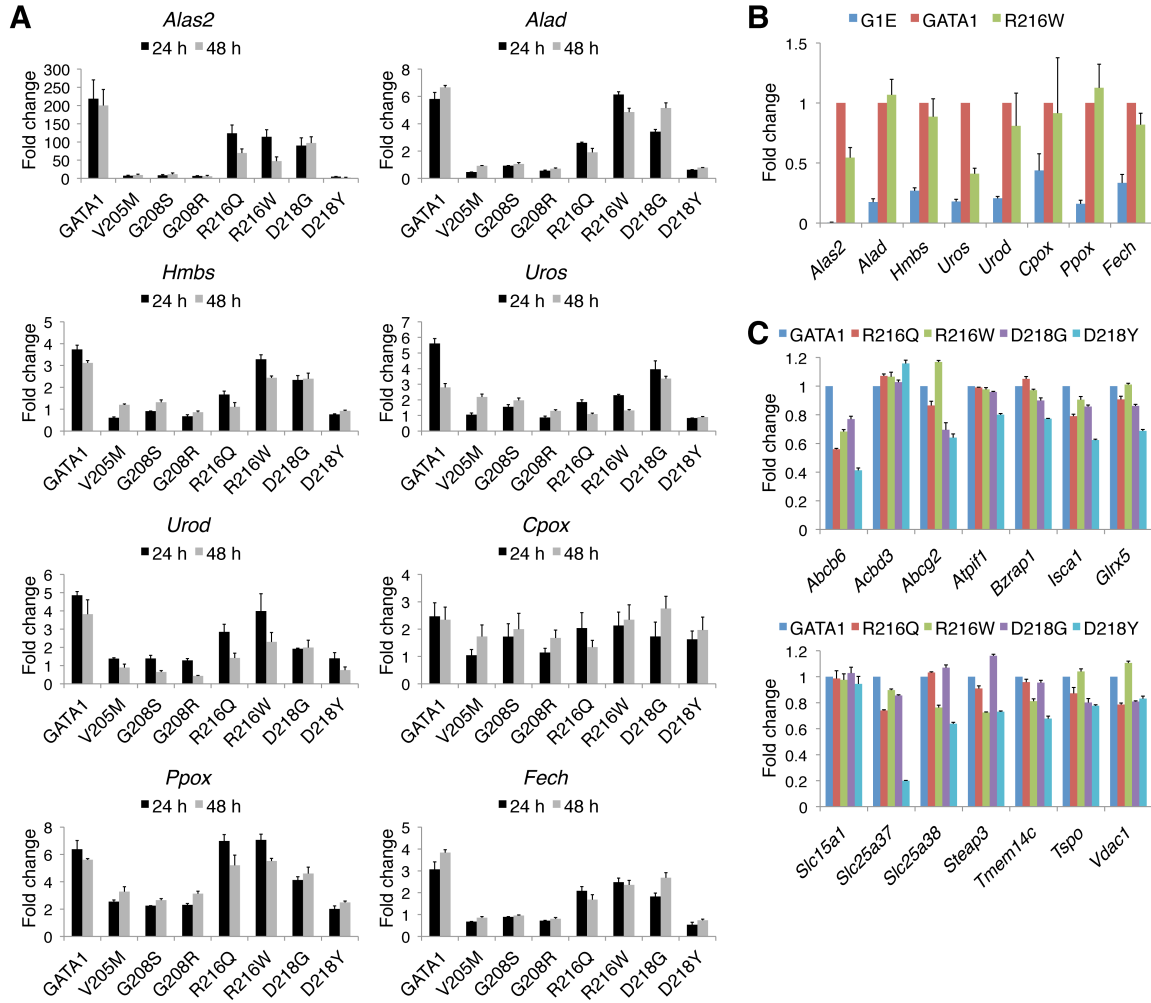

Supplemental Figure 2

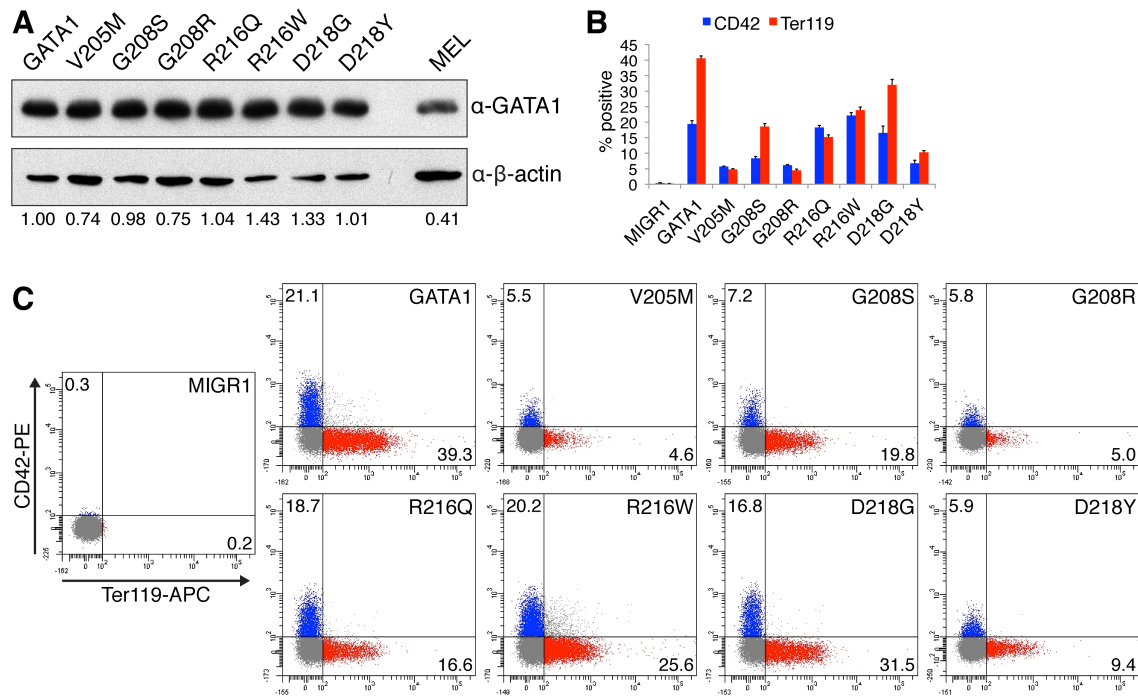

Supplemental Figure 3



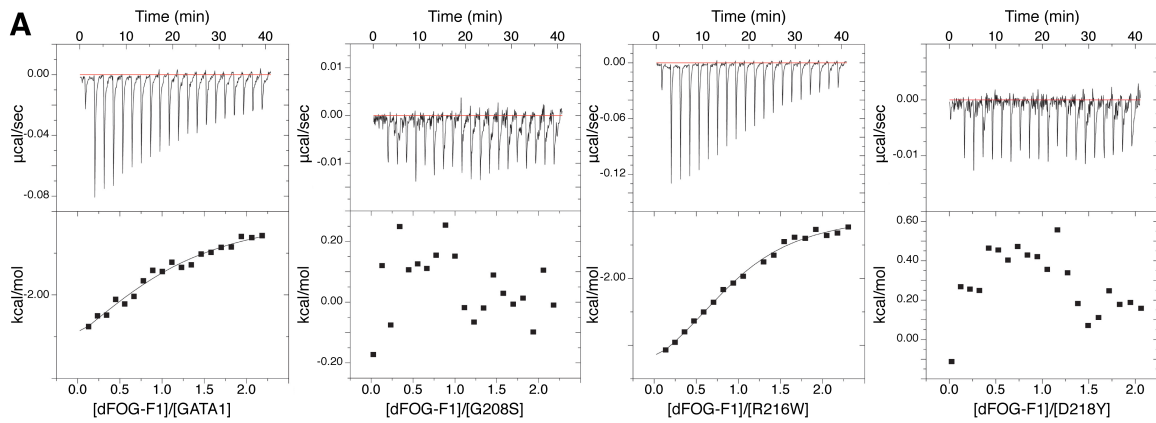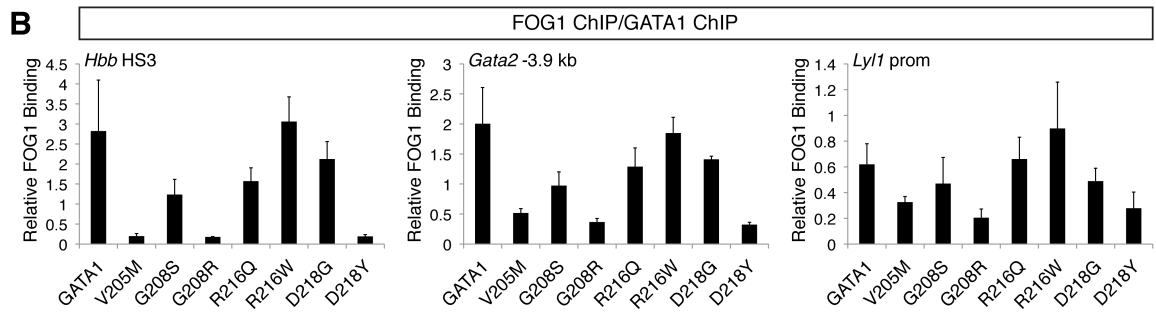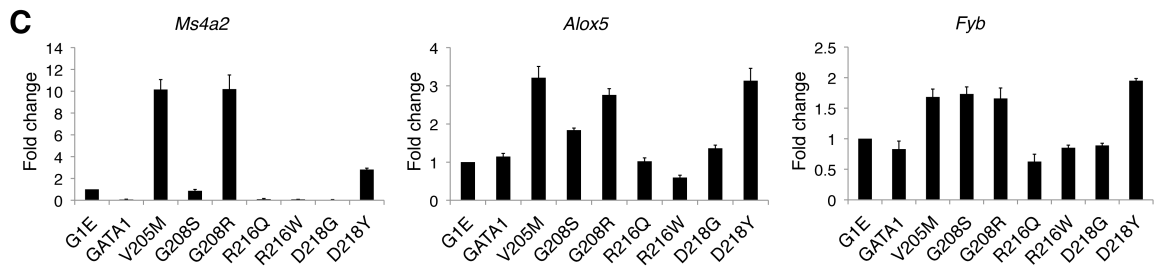

Supplemental Figure 4

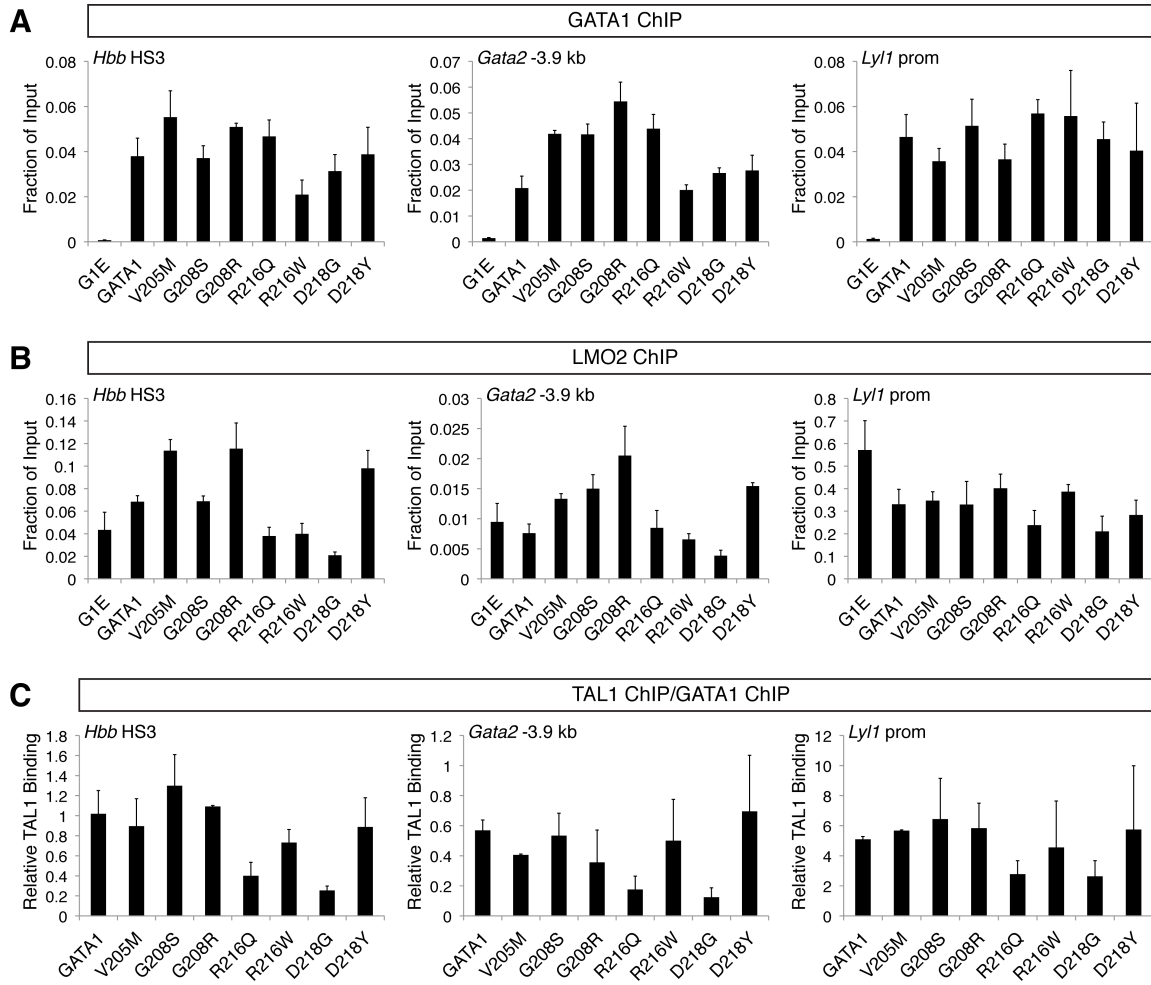

Supplemental Figure 5

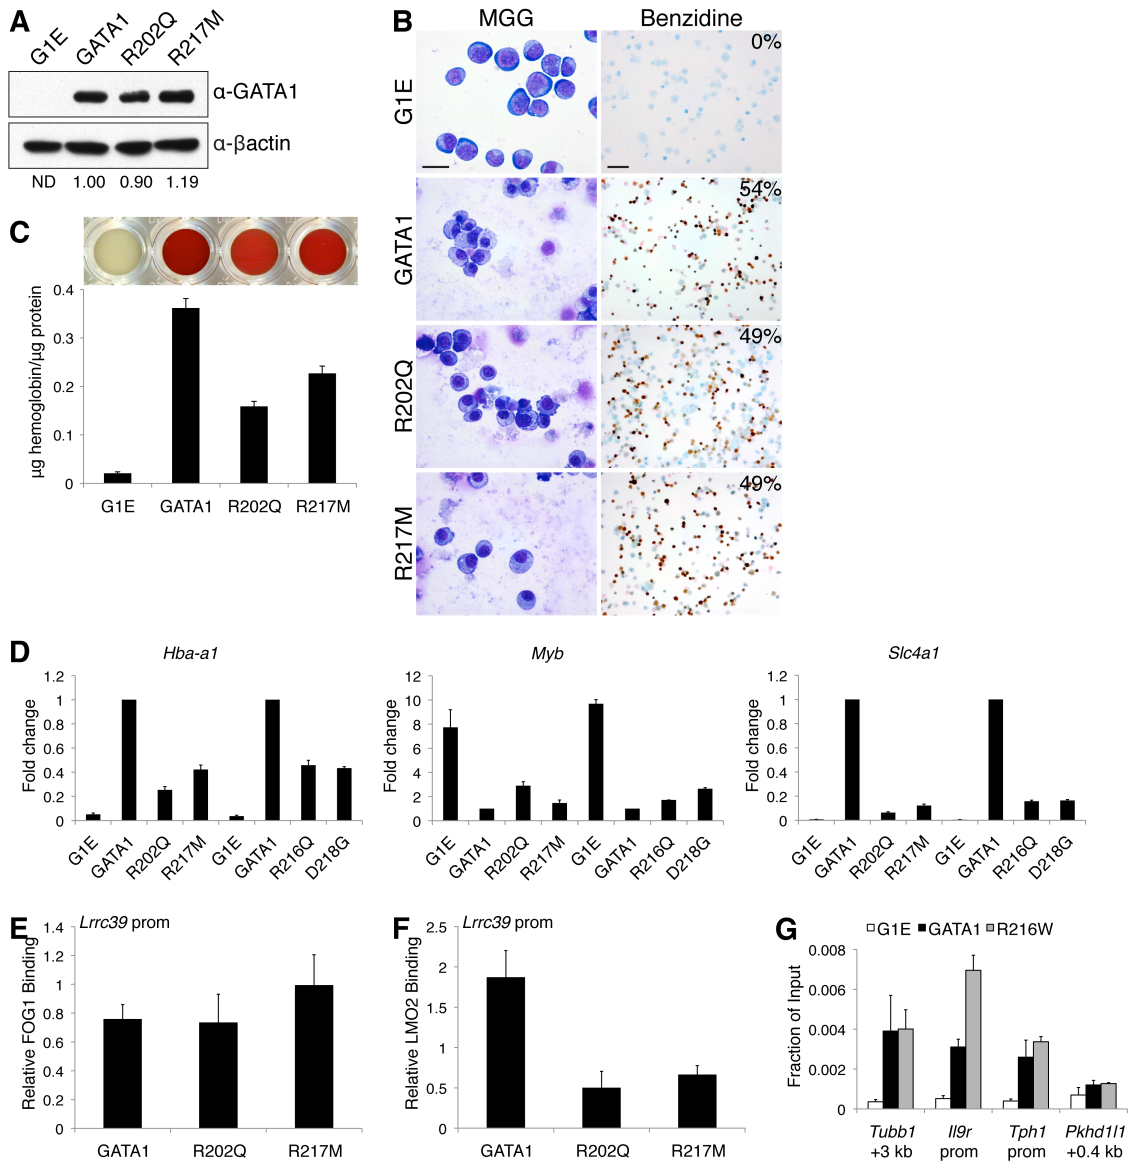

Supplemental Figure 6

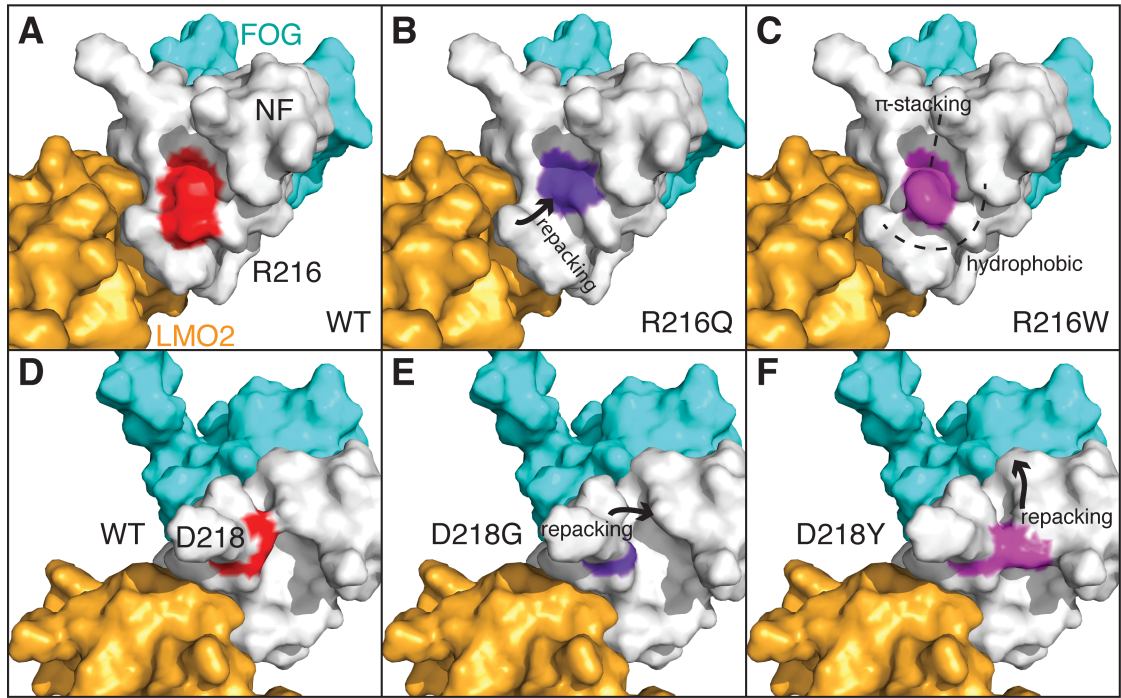

Supplemental Figure 7
